# Supplementary material for: Copper-based metal–organic xerogels on paper for chemiluminescence detection of dopamine
Source: Royal Society of Chemistry journal article supplement (doi:10.1039/d0ay01191f), 2020-01-01
Supplement: d0ay01191f1.pdf [file d0ay01191f1.pdf]

## Supplementary Material

### **Copper-based metal-organic xerogels on paper for chemiluminescence detection of dopamine**

Liu Zhang<sup>a</sup>, Yue Hou<sup>a</sup>, Congcong Lv<sup>a</sup>, and Wei Liu <sup>iD</sup>\*<sup>ab</sup>, Zixuan zhang<sup>a</sup>, Xing Peng<sup>a</sup>

*Key Laboratory of Analytical Chemistry for Life Science of Shaanxi Province,*

*School of Chemistry and Chemical Engineering, Shaanxi Normal University, Xi'an, 710062, PR*

*China*

\* Authors to whom correspondence should be addressed; E-mail: weiliu@126.com;  
liuwei2@hotmail.com

## Results and discussion

### Optimization of experimental conditions

In order to optimize the experimental result, the next conditions should be considered in the luminol-H<sub>2</sub>O<sub>2</sub> system on the paper-based chip: (A) The type of the copper salts; (B) luminol concentration; (C) H<sub>2</sub>O<sub>2</sub> concentration; (D) pH value.

Firstly, the cationic source of copper salts was explored, including CuCl<sub>2</sub>, CuSO<sub>4</sub>, Cu(Ac)<sub>2</sub> and Cu(NO<sub>3</sub>)<sub>2</sub>. The CL intensity of Cu-MOXs with equal amounts of Cu<sup>2+</sup> was recorded in Fig. 2A. When CuCl<sub>2</sub> was used as the anion source, the results showed that the peroxidase mimic activity of Cu-MOXs was the best. **Then CuCl<sub>2</sub> was chosen as the best cationic source in this work.** As the concentration of luminol can greatly affect the CL intensity, the effect of the concentration of luminol was studied over the range of 0.8 mM to 4.0 mM (Fig. S2B). With the increase of concentration of luminol, CL intensity ( $\Delta I$ ) increased gradually. When luminol concentration is greater than 4 mM, CL intensity had no obvious changes in the subsequent experiment. So, in this work, 4 mM of luminol was chosen for later use.

Next, the concentration of hydrogen peroxide was selected. The effect of the concentration at 0.1mM-3.0 mM was investigated and the results were shown in Fig S2C. **From the results, we can see that the CL signal increased with the concentration of H<sub>2</sub>O<sub>2</sub>. The signal decreased after the concentration was higher than 2.0 mM. The reason for this is that H<sub>2</sub>O<sub>2</sub> decomposes fast at higher concentration. So, the proper concentration for H<sub>2</sub>O<sub>2</sub> was 2.0 mM.**

**As we all know, the CL signal of luminol can be produced in the basic solution. Then** the pH value was selected from 10.0 to 12.5 (Fig. S2D). It was found that the CL intensity increased with the pH value from 10.0 to 12.0. After the pH value was higher than 12.0, CL intensity declined a little. **The signal/noice ratio was the best with pH of 12.0.** So, 12.0 was selected as the optimal pH value in the later work.

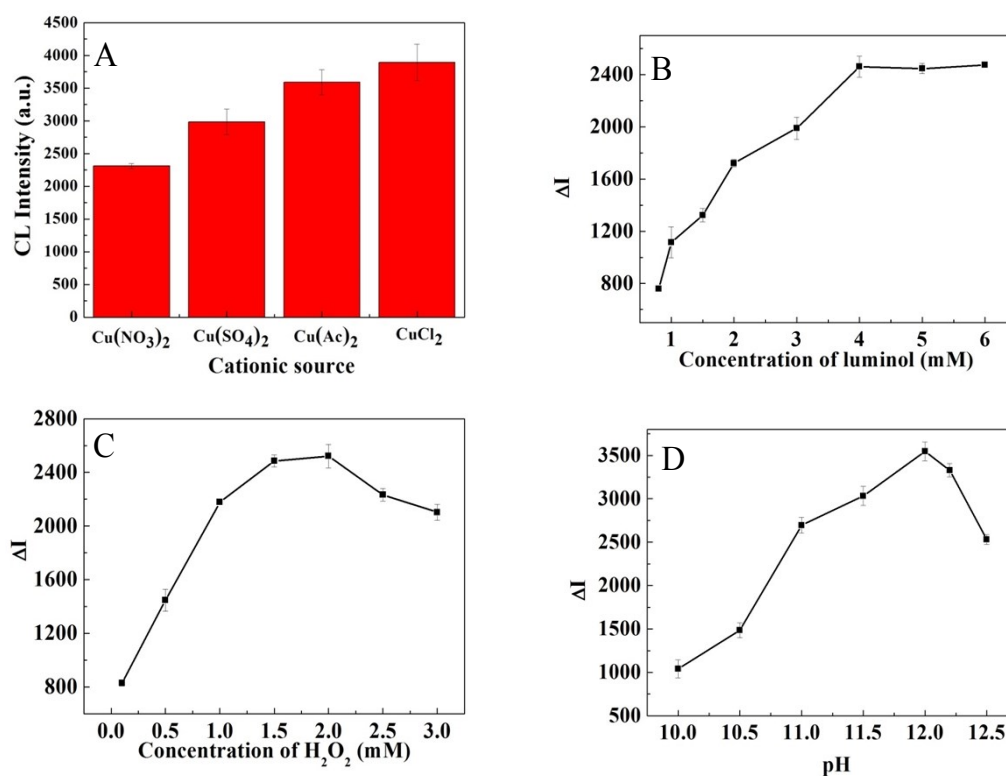

Fig. S1 Effect of the reaction conditions on luminol-H<sub>2</sub>O<sub>2</sub> CL system in the presence of Cu-MOXs. (A) Effect of CL intensity from different anion; (B) Effect of luminol concentration. pH: 12.0; H<sub>2</sub>O<sub>2</sub>: 2.0 mM; (B) Effect of H<sub>2</sub>O<sub>2</sub> concentration. luminol: 4.0 mM; pH: 12.0; (C) Effect of pH. luminol: 4.0 mM; H<sub>2</sub>O<sub>2</sub>: 2.0 mM. (Error bar represents the standard deviation for three measurements).
